# Supplementary material
Source: Royal Society of Chemistry journal article supplement (doi:10.1039/d5tb01573a)
Supplement: d5tb01573a1.xlsx [file d5tb01573a1.xlsx]

## Sheet: Dataset 1
	Dataset S1. Data-set matrix of fluorescence response patterns of seven different E. coli strains (OD600 = 0.1).
		pH 7.0										pH 5.0
		P1		P2		P3		P4		P5		P1		P2		P3		P4		P5
		Ch1	Ch2	Ch1	Ch2	Ch1	Ch2	Ch1	Ch2	Ch1	Ch2	Ch1	Ch2	Ch1	Ch2	Ch1	Ch2	Ch1	Ch2	Ch1	Ch2
	E.C. 1	24074	17548.6	23378.4	17615.4	22351.4	16215.8	17956.4	13319.8	12160.8	12127.8	22013.6	17000.6	21493.4	17068.8	19680.6	14964.8	16306.6	12322.8	15548.4	13016.8
	E.C. 1	24253.4	17522.6	23248.6	17100.6	22716	16219.4	18642	13819.8	11922	11803.8	21548.2	16660.8	20211.8	16019.6	18598.2	13883.2	16333.2	12053	14814.6	12202.2
	E.C. 1	25719.2	18622.6	24341.2	17931	23164.8	16640.4	18823.4	13842.6	12765.4	12518.6	23473.8	17863.6	22477.6	17616.4	21446	16151.2	17107.8	12767.2	16292.2	13388.2
	E.C. 1	23483	17039.8	22480.2	16482	20773.2	14717.4	17745.6	13047.2	11766	11480.8	20843	15791.4	20740.8	16382	20520.6	15438.2	17049	12903	14736.6	12166
	E.C. 1	24935	18292.8	23922	18005.8	22632.2	16369	18514.2	13686.2	11845.2	11752	21854.6	16832.6	21170.8	16618.4	19414	14757.2	16081.2	12091.4	15306.6	12688.8
	E.C. 1	23741.8	17310.4	22966.8	16968	21395.6	15238.2	18120.8	13336.4	12020.4	11766.2	21563.2	16349.6	20783.6	15910.2	18649.4	13874.6	16183	12010.8	15296.8	12416.6
	E.C. 1	25117.2	18135	23978.2	17825	22310.6	16104.4	18422	13398.8	12360.2	12106.8	20502.6	15305.8	21227.4	16356.4	20180.4	14931.2	17439.6	12736.2	14107.8	11189.4
	E.C. 1	23938.2	17301	22288	16593.4	20440.6	14462.6	18073.2	13040.4	11760.4	11482.2	21495.2	15883.8	21043.2	15944	19146.6	13837	16050	11622.8	14506	11472.2
	E.C. 2	14986	15192.6	14333.2	15941.8	12734.8	14394	8731.6	9983.4	5285.2	7433	13807.6	14711.4	14070.6	15666.6	13728.6	14582.6	9649.2	10462.8	8810.4	10172.4
	E.C. 2	14944.2	15330.4	13090	14988.2	12143.8	14039.4	9267.4	10892.6	5152.6	7335.8	13788.2	14609.4	13941.4	15937.4	12721.2	13566.2	9193.2	10322.2	8792.6	10302.2
	E.C. 2	16020.4	16078.4	15725.6	17320.6	14005	15285.4	9625.4	10787.8	5888	8223.2	14710.6	15541	14896.4	16395.4	14602.4	15520.2	10082	10866	9354.6	10605.4
	E.C. 2	14188	14200.6	13344.8	14856	11897.4	13596.8	8954.4	10233	5163	7337	15181.6	15954	14829.8	16568.4	13236.8	14118.2	9752.4	10788.6	8829	10271.6
	E.C. 2	15785.2	15744.4	14887.4	16638.2	13292.2	14874	9460.8	10554.8	5320.4	7663.2	13945.4	14567	14344.6	15882.2	12891.8	13607.8	9652.6	10543.4	8069.6	9322
	E.C. 2	15434.4	15499.8	13418.4	15426.8	10656.2	12661.6	8527	10256.4	5075.4	7395	13959.2	14893	13846.8	15932.8	12087.6	13251.2	9071.2	10339.2	8852	10517.4
	E.C. 2	16297.6	16010	15446	16763.4	13752.6	15021.8	9931.6	11008.4	5807	8100.4	15720.8	16295.8	15596.4	17066	13717.6	14403	10214.2	10910.8	9053.2	10124.4
	E.C. 2	15905.4	15657	14763.6	16064.8	11971.2	13174.4	9412.2	10473.6	5381.6	7449.4	15294	15821	14850	16220.2	12157.6	12430.4	10291	10829.4	8309.2	9434
	E.C. 3	20848.6	17410.6	19530	16939.4	18316.4	15281.8	14351	12333.6	7907	9392	18376.4	16558.4	18472.2	17212	17354.8	15174.6	13458	11945.4	12679	12502.4
	E.C. 3	21241.6	17483.6	17802.4	15488	19264.2	15728.6	14956.8	12483.2	8243	9512.4	17743.4	15936.6	17772.6	16518.4	16759	14086	13474.8	11656.2	12500	12229.6
	E.C. 3	23198.8	18984	21306.2	17736.6	20681.4	16426.2	15895.2	13002.6	8381.6	9768.6	19242.2	16880	19156.8	17285	18702	15468.4	13899.8	11772.2	13541.4	12674.6
	E.C. 3	20857.4	16961.4	18533.4	15943.6	17042.4	14193.6	14101.6	11954.8	8094	9332.4	19020.8	17048.6	18744	17514	17229.4	14765	13230.2	11852	12450.2	12105.8
	E.C. 3	18814.4	15516	21232.8	18097.2	19046.4	15465	14061	11853.6	7682.4	9136.2	19121.8	17050.2	19636.6	18430	17476.6	14913.8	13342.8	11641.2	12897	12639.6
	E.C. 3	21578.2	17460	19002.6	16054.4	17990.4	14156.8	14967	12203.4	8085.6	9262.6	18191.2	16114.6	18252.2	16642.8	16127.4	13430.4	12856.4	10852.4	12543.8	11798.6
	E.C. 3	20863.8	16867.2	21501.2	18131.6	18973	15450.2	14617.8	12219.8	8290.8	9543.2	17589.6	15577.4	19490.8	17967.6	17907	15237.4	13450.6	11669.8	12387.2	11744.2
	E.C. 3	20475.8	16533	21180.4	17573.2	18748.6	14897	14499.6	11812.4	7920.4	8923.4	19205.2	16909.8	18744.8	16820.6	16723.6	13739.6	13745.4	11666.4	12475.8	11508.6
	E.C. 4	25044	18372.2	19842.6	14999.4	23729.6	16946	17551.2	13432.4	13170	12686.4	21658.4	16956.6	21702	17272.6	22044.6	16595.4	17606	13652.6	16980	14649.8
	E.C. 4	21506.6	15931.6	23066	16975.2	22831.8	16293.8	15920	11880.2	12241.6	11452.4	21609	16667.8	19320.2	15266.8	19657.4	14670.4	16207.6	12375	16451.8	14131.2
	E.C. 4	26660.8	19424.4	22580.6	16679	24246.6	17152.2	16900.8	12743.2	13246.4	12562.8	22432.4	17193.2	22077.6	17592	22845.8	17001.2	17635	13502.2	17864.4	15242
	E.C. 4	24270.4	17579.6	21774.8	15897.6	22652.4	15940.8	17176.2	12631.8	12871.6	11966	22489.6	16783.4	22763.8	17913.2	20376	15020.2	17273.2	13081.8	16857.8	14210
	E.C. 4	23934.6	17582.2	23704	17735	21553.6	15442	17075.6	12867.6	11716.2	11129.6	22423.6	17339.4	22959	18394.6	20626.8	15166.4	16499	12746.8	16246.2	14197.8
	E.C. 4	25363	18584	21986.6	16448.6	21591.8	15087.6	17892.2	13432.4	13267.8	12504.2	22856.6	17685.2	21784.8	17218.2	20438.4	15051.2	16959	13107.6	17039	14443.2
	E.C. 4	24839.6	17995.6	22441.2	16672.6	22093.2	15630.6	17597.6	12985.2	12857	11990.6	23837.6	18101.4	24555.6	19552.4	20378.8	15110.4	17937.4	13653.8	17203.6	14410.8
	E.C. 4	24932.2	17792.2	23469.4	16943.8	21574.4	14866.6	17273.8	12488.8	12608.8	11467.4	22430.8	16863.2	22339.2	17183	20224.8	14424	17103.6	12664.4	15605.6	13066
	E.C. 5	24817.6	18504.4	23524.2	17679	23152.6	16665	18028.8	13877.8	13192.8	13052.8	24833	19781	19539.2	15916.8	22325.2	16982	17272	13666.2	16519.8	14491
	E.C. 5	24266	18190	21583.6	16323	23753.2	16929	17835.6	13593.2	13246.8	12954.4	23399.8	18635	20782.4	16802.6	22527.4	16971.2	16295.6	12866	16389.4	14125.8
	E.C. 5	25781.4	18874.4	24351.6	18103	26350.8	18558.6	18875.8	14059.4	14154	13588.4	25007.4	19598.6	20676.8	16390.4	23623.6	17540.8	17696	13454.4	17320.6	14556.2
	E.C. 5	26573.4	19376	24638.2	18269.8	24112.6	16996.8	18603.4	14097.4	13069	12616	21830.6	17090.2	21709.6	17439.2	21399.6	15765.8	17783.6	13605	15969.6	13656.8
	E.C. 5	26669.6	19535.6	24199.2	18316.8	24035	16898.6	19009.6	14537.8	13342.2	13132.4	23046.8	18404.2	21805	17779	20727.4	15487.4	16720	13028.8	15800.2	13934.2
	E.C. 5	26017	19037.8	23663.4	17523	23002.8	15984.8	18499.6	13848.4	14093.8	13653.4	23765.2	18534.8	22494	17618	21293.8	15480.8	16994.2	12949.8	16316.8	13801.6
	E.C. 5	27134.4	19651.8	25356.2	18710.2	24305.2	17426.6	19853.6	14770.2	13580.2	13071	22478.8	17293.2	23702.4	18690.6	21491.2	15554.6	17789.2	13531	16278	13640.8
	E.C. 5	27457	19895.4	25433.6	18526.6	23835.4	16647.8	18888	13836.2	13585.2	12805.2	24152	18528.8	23623.2	18332.4	20790	15055	17628.4	13246.8	15785.6	13025.6
	E.C. 6	19363.2	16749.8	19028.8	17244.2	18334.4	15570	14537.4	12618	8181.8	9896	16965.8	16160.4	16055	15802.8	16096.8	14377	12348.8	11512.4	10060.4	10546.2
	E.C. 6	19740.8	17061.2	19338	17125.4	19185.4	15773	14326.2	12212	8239.6	10124.6	17981	16851	17567	16891.6	15191	13213	12933.2	11649.8	11326.2	11356
	E.C. 6	20877.4	17880.2	20411.6	17863.4	19743.4	16200.6	15207.2	12678.4	8908.8	10545	17918.2	16457.4	18928.8	18229.4	17983.2	15314.8	12485.2	11139.6	10825	10857.8
	E.C. 6	21065	18064.6	20327	18358.8	19941	16600.6	15082.8	12993.4	8336	10007.8	17337.4	16112	16825.8	16444	14943.8	13181	12454	11386.4	10337.8	10578
	E.C. 6	21317.2	17928	21005.8	18587.2	19938.6	16381.2	14847	12457.8	8023.2	9861.4	15552.4	14556.4	18202.8	17545	15732	13593.4	11627	10377.6	10690.8	11029.4
	E.C. 6	20657.2	17473	19333.8	17049.8	18794.8	15122.2	14675.8	12191.4	8270.4	10131.4	17533	16209.6	16578.8	16000.6	15514.2	12905.4	12145.4	10784	10186	10404.2
	E.C. 6	21214.2	17837.6	21687.8	18924.8	20330.6	16532.6	15534.6	13180.6	8341.4	10024.8	16725.8	15426.2	17954	17302.2	15173.6	12953.2	12596	11230.4	10548	10417.6
	E.C. 6	20907.6	17478.6	20115.8	17549	18507.6	15043.8	15147.2	12576.2	7955.2	9338.4	17812	16037.8	16782.2	15841.2	15412.4	13092.6	12586.6	10900.2	10307.8	10169
	E.C. 7	26461.4	19039.8	24192.2	17714.4	24291.6	17023.6	19571.4	14727.8	14022.4	13464.8	24767	19277.2	22749	17868.2	22526.8	16735.4	18934.6	14701	17050.2	14659.6
	E.C. 7	27683.2	19936.6	23857.2	17376.4	24829.6	16931.8	20349	14771	14576.6	13675.6	21341.6	16630.6	24229.6	18762	22711.2	16482.6	17850.6	13642.8	17911.2	15040.8
	E.C. 7	27437.4	19750.8	25094.4	18110.8	26354.6	18175.2	19972.2	14634.8	14886.6	13946.6	25906	19873.6	23418.8	18370.6	24534.4	18096	19629.2	14863.8	18728.8	15668.4
	E.C. 7	27104.6	19262.8	25698.2	18728.8	25562	17352.8	19074.6	14012	14692.8	13698.2	22975.4	17414.2	23069.2	17934.2	22094.8	16179.8	19022	14410.4	17284	14188.8
	E.C. 7	27800.4	19817.6	25474.2	18335.6	24960.8	17273.4	19760	14534.8	14235.6	13457	25152	19167.2	23981.4	18489.2	22908	16502.8	19302.4	14554.2	14424.6	12313
	E.C. 7	26927	19148.6	24964.6	18029.2	23451.8	16042.4	20116	14548.8	14656.6	13809.6	24408.2	18535.2	23392.4	17856.4	21606.6	15580.2	18687	13998	17244.2	14438.2
	E.C. 7	26498.2	18794.6	26749.2	19236	25454.2	17632.8	19623.2	14291.8	15156.4	14050.8	26354.2	19725.6	25139.2	19578.8	23169	16794.8	20072.6	14939	18463.6	15266.4
	E.C. 7	27360.4	19249	26573	18828.6	24588	16595.2	20496.4	14656.2	13947.2	12775.4	23934	18083.4	23399.4	17864.2	22166	15898.6	18953	14032.8	15988.6	13053.2

## Sheet: Dataset 2
	Dataset S2. Data-set matrix of fluorescence response patterns of milk samples contaminated with seven different E. coli strains (OD600 =0.1).
		pH 7.0										pH 5.0
		P1		P2		P3		P4		P5		P1		P2		P3		P4		P5
		Ch1	Ch2	Ch1	Ch2	Ch1	Ch2	Ch1	Ch2	Ch1	Ch2	Ch1	Ch2	Ch1	Ch2	Ch1	Ch2	Ch1	Ch2	Ch1	Ch2
	E.C. 1	10820.6	10178.8	12080.6	12314.6	8712.2	8810.6	9459.2	9845.6	5156.8	6111.2	6949.4	6071.4	8735.6	8719.6	5973.2	5912.6	8864.6	9261.6	3983.4	4309.8
	E.C. 1	10591.8	9603.8	11790.8	12032.8	8172.4	8044	10138	10307.2	5027.2	6053.6	7097.8	6057	8061.2	8051.4	6021.4	5928.6	9224.2	9601.6	4297	4523.2
	E.C. 1	10189.8	9206.6	11432.6	11594.4	7709.8	7731	9914.2	10111.4	4886.6	5720	6614.4	5635.8	7792.8	7781.2	5765.8	5465	8476.2	8899	3966.6	4264.2
	E.C. 1	9841.4	8948.2	10987.8	10988.6	7645.4	7509	9549.8	9722.6	4909.2	5887	7088.6	6191.2	8181.6	8086.8	5364.8	5360	8495.8	9065.6	4048.8	4130
	E.C. 1	10272.6	9203.8	11140	11472.6	7953.8	7849.2	9169	9423.2	5006	6032.6	6899	6285.6	8590.2	8617.4	6054.6	5745.8	8858.2	9275.4	4246.8	4512.6
	E.C. 1	10032	9008	11463.6	11491.4	7864.4	7922.4	9851	9988.2	4808	5609.6	6672.4	5820.8	7970	7893.4	5806.4	5756.4	8574.2	8875.4	3914.8	4100.2
	E.C. 2	7170	8219.6	7827	9300.6	5864.2	7182	6659.2	8332.2	2685.2	4029.6	2304.2	2603.2	3055.6	3704	2187	2839.4	3406.2	4232.4	829.2	1347
	E.C. 2	7045.8	7860.4	7678	9221	5735.6	6914.6	6732.2	8245	2441.4	3733.4	2238.6	2412.4	3010.6	3605.4	2080.2	2706.6	3221.2	3920.6	816	1252.6
	E.C. 2	6358.6	7247	7069.8	8354.4	5015.8	6251.8	6358.6	7542.2	2406.8	3519.4	1913	2010.2	2775.8	3276.4	1888.6	2407.6	2851	3741.4	774	1183.2
	E.C. 2	6392.2	7280	7231	8706.6	5232.2	6401.8	6217.8	7483.6	2389.8	3576	2019.2	2115.6	2779.4	3443	1901.4	2370.8	2839.4	3699.8	764.8	1164.6
	E.C. 2	6585	7495.2	7087.6	8430.2	5378.2	6605.6	6023.6	7574.4	2495.8	3662.8	2071.4	2363.2	2877.8	3520.2	1928.8	2428.8	2975.4	3699.4	756.8	1194.2
	E.C. 2	6776.8	7687.2	7351.4	8907.6	5318.8	6487.2	6745.6	8361.4	2607.8	3868	2267.8	2491.8	2863.8	3535.2	2004.6	2585.6	3261.4	4171.6	901.8	1211.2
	E.C. 3	8480.6	8374	9407.6	10316.6	7201.6	7522.6	8524.6	9273.4	3606.8	4575.6	4479.8	3894.4	5097.6	5092.2	3456.6	3418.4	4796.8	5216	2271.8	2101.8
	E.C. 3	8626.6	8497.4	9580.2	10263	6926.4	7474	8863.4	9569.4	3639	4525.6	4120	3486.6	4787	4590.6	3162.4	3222.8	4701	5010	2029.6	1959.2
	E.C. 3	8601.4	8167.6	9419.6	10145.8	7223.6	7449.4	8871.2	9430.2	3509.4	4532.2	4107.2	3460.8	4551.6	4497.8	3098.8	3056.8	4742.8	4778.8	1872	1790.8
	E.C. 3	8520.4	8246.2	9257	9720.6	6590.2	6862.8	8191.6	8635.6	3568	4578.6	3986	3312	4626.6	4519.6	3172.8	3244	4479.2	4616.6	1996	1932
	E.C. 3	8235.6	8068.2	9179	9761.2	6953.4	7361	8213.4	8738.6	3515.8	4525.6	4114.6	3611.2	4507.6	4553.8	3238	3175.6	4610.2	5015	1923	1809.4
	E.C. 3	8501.8	8223.4	9547.6	9881	6768.8	7131.6	8494	9153.8	3633.8	4580.8	4238.2	3625	4848	4733.4	3324.2	3283.4	4845.4	4981.4	1990.6	1909.8
	E.C. 4	7256.6	7363.6	9104.8	10042.4	7002.4	7706.4	8455.6	9666	3114.8	4224.6	3179.8	2873.2	3927.8	4126.4	2738.2	3069.2	4328.8	4725.8	1326.2	1610.4
	E.C. 4	7839.6	7845.8	9580.6	10655.4	7288.4	7969.2	8652.6	9688.8	3192.6	4479.4	3282.8	2893.8	4005.8	4232.6	2900.4	3247.8	4348.2	5203.2	1498.4	1639.4
	E.C. 4	8608.4	8573.6	10477.4	11286.8	7037	7486	8954	10171.4	3402.4	4419.8	3342.6	3076	4126	4428.2	2760.8	3030	4479.6	5098.2	1559.8	1731.8
	E.C. 4	7615.8	7736.2	9402	10408.4	6676.8	7351.2	8184	9239.2	3184.2	4339.8	3235.6	2905.6	3890.8	4266.8	2718.4	3005.6	4280	5024.8	1391.8	1629.6
	E.C. 4	7834	7833.8	9541.8	10511.6	6947	7570	8533.6	9970.4	3387.2	4360.2	3396.8	3033.2	3880.6	4272.2	2753.2	3132.6	4151.4	4869.2	1475	1762.4
	E.C. 4	7886	7950.4	9677.2	10621.2	6960.2	7532	8925.8	9924	3272.2	4488.4	3324.4	3119.6	4009.8	4327.2	2852.8	3224.4	4566.4	5175.8	1504.6	1687.6
	E.C. 5	10050.8	9548.2	11398.8	12156.4	8565	9010.6	10130.4	11113	4781.4	6058.4	5813.8	5343.6	6796.4	6971.2	4849	5114.8	7175	7788.2	2836.4	3143
	E.C. 5	10702.6	10073.4	11507.2	12143.2	8811.6	9087.2	10064.6	10957.2	4942.2	6115.2	5851	5492.4	7302	7494.8	4972	4901.2	7608.4	8584.4	2955.6	3367.8
	E.C. 5	10436.4	9687.8	12047.4	12506.8	8255.6	8262	10510.4	11361.8	4768.6	5849.4	5845.8	5105.4	6950.8	7068.4	4694.6	4623.2	7249.4	8046.2	2931.4	3322
	E.C. 5	10443.8	9815.6	11801.4	12556.8	8230.2	8358.4	10111.6	11082	4934.8	5999	6046.4	5521	6955.6	7087.8	4733.4	4810.2	7169.8	8085.8	3164	3381.6
	E.C. 5	10426.8	9747.6	11582.4	12278.6	8477.6	8510.2	9935	10844.4	4711.6	5741	6115.4	5584.8	7124.2	7346.6	4958.6	4962.4	7474	8296.6	3049	3356.2
	E.C. 5	10121.4	9429.8	12250.4	12355.2	8041.8	8289.6	10371.2	11543.2	4896.4	6043.2	5947.8	5391.4	7089.4	7462.4	4734.8	4807.6	7498.4	7988.4	3146.6	3418
	E.C. 6	8856	9609.2	10443.6	11894.6	7664.4	8955	8334.2	9602.8	3476.4	5012.6	4031.8	4086.2	4741.8	5360.8	3303	3882	5426.4	6510.2	1602.4	2020.6
	E.C. 6	9250.6	9886.4	10734.8	12312.8	7650.6	8862.6	9438.2	10848.6	3843.6	5387.6	3832	3771	4483.2	5075.6	3285	3716	5351.8	6307.4	1477.2	1939.8
	E.C. 6	8664.8	9205	10046.8	11463.2	6916	8034.4	9181.4	10593	3519.8	4983.6	3655.4	3678.8	4495	5015.4	2969.4	3398.8	4865.8	5840.6	1494.6	1838.8
	E.C. 6	9182.4	9796.8	9962	11492.4	7016.8	8119	8968.2	10373.2	3456.4	5006.6	3766.2	3842.4	4394	5130.4	3061.6	3474.4	4696.4	5605	1543.4	1925.8
	E.C. 6	8762.4	9213.4	9724.2	11150.4	6183.6	7038.2	8886.6	10175.2	3518	5027.4	3903	4068.6	4742.6	5417.6	3028.2	3613.2	5003.2	6043.8	1702.8	2127.6
	E.C. 6	9059.6	9621	10025.6	11624.2	7239	8237.4	9179.4	10606.6	3806.8	5386.4	3992	3989.8	4482	5077	3255.2	3736	5216.8	6020.8	1625.2	2064.4
	E.C. 7	6635.4	6570.2	7938.2	8742.2	5988.8	6704	7858.2	8972	2684.6	3422	2267.6	1909	3006.6	3200.8	2353.8	2591.4	3315	3762.4	1050	1256.4
	E.C. 7	6733.2	6721	7538.6	8138.6	6132.4	6793.2	7382	8297.6	2648.4	3434.2	2361.8	1940.2	2961.6	3186	2318.6	2518.2	3338	3838.2	1032.8	1073
	E.C. 7	6321.6	6379.4	7394.2	8001.6	5810.8	6328.4	7414.6	8155.6	2463.4	3242.2	2147.6	1857.8	2864.2	3069.8	1964.8	2168.8	3098	3514.4	943.8	1100.2
	E.C. 7	6425	6552.2	7167	7964.4	5462.6	6272.4	6766.8	7786.8	2224.8	2951.8	1899.4	1745.8	2564.8	2889.6	1832.6	2111.6	2662.4	3096.2	941.6	1047.4
	E.C. 7	6264.2	6295.6	7190.2	7948.2	5874.2	6526.2	7389	8283.4	2546.6	3457.6	2207.6	1927.8	2920.2	3232.8	2130.2	2395.6	3241.2	3602	1034.2	1239.8
	E.C. 7	6185.4	6201	7013.8	7567.4	5816.6	6539	7231.8	8165.4	2584.8	3361.6	2026.6	1759.2	2674.6	2898.6	2011.6	2247.4	2917.4	3208.4	903.6	1053
	E.C. -	5856	6572.2	6214.4	7547	4862.2	6064	5434.8	6760.6	2043.8	3038	1665.8	1895	2296.8	3024	1575.6	2001.4	2534.6	2989.6	564.8	838.8
	E.C. -	5841.6	6504.8	5878	6970.8	4734.8	5796	5570.6	6756.6	1916.6	2856.8	1556.6	1785.2	2269.6	2727.6	1547.6	2011	2543	3147.6	531.6	861.6
	E.C. -	5713	6411.6	5895.8	7085.4	4442.4	5494.4	5400.6	6678.8	1819.2	2884.8	1517.2	1675.6	2209.8	2809.2	1456.2	1939.6	2441.8	3155.4	516.4	855
	E.C. -	5626	6402.8	6010.8	7069	4602.8	5657.8	5241.2	6459	1915.8	2855.6	1606.4	1808	2251.2	2869.4	1495.8	2010	2521.6	3170	543.4	928.8
	E.C. -	5504.2	6414.6	5887.6	7117	4554	5450	5186.2	6358.2	1908.2	2834.4	1590	1890.8	2184.6	2737	1411.4	1821.4	2250.4	2974.2	520.8	909.4
	E.C. -	6112	7031.6	6417	7686.4	5043	6257.8	5951.6	7268.8	2064.6	3082.2	1783	2147	2353.8	3094.4	1647.2	2140.6	2647.6	3449.8	511	809.6

## Sheet: Dataset 3
	Dataset S3. Data-set matrix of fluorescence response patterns of milk samples contaminated with mixtures of E.C.1 and/or E.C.5 (total OD600 = 0.08, 0.16, 0.24).
		pH 7.0										pH 5.0
		P1		P2		P3		P4		P5		P1		P2		P3		P4		P5
		Ch1	Ch2	Ch1	Ch2	Ch1	Ch2	Ch1	Ch2	Ch1	Ch2	Ch1	Ch2	Ch1	Ch2	Ch1	Ch2	Ch1	Ch2	Ch1	Ch2
	0 / 0	3066.4	3147.2	3447.7	3796	2918.1	2854.9	2730.1	3253.4	687	862	206.2	-242.5	628.3	519.5	593.8	105.6	613.4	812.4	173.2	26.5
	0 / 0	1174.1	958.2	1817.1	1840.3	1944.9	1821	1750.2	2166.6	437.6	344.8	-147.6	-687.9	289	-21.4	60.3	-640	232.8	88.8	84.8	15.7
	0 / 0	3590.4	4093.6	4041.2	4822	3558.8	4139.3	3040.8	3652.7	768.4	1116.6	174.1	-205.4	720.7	664.4	706.5	440.9	475.5	481.4	180	162.4
	0 / 0	3222.5	3645	3907.1	4756.2	3003.6	3326.9	2318.7	2745.5	608.7	844.5	292.3	-6.2	662.4	501.8	622.2	301.3	463.3	339.6	175.4	186.6
	0 / 0	3404.6	3888.3	5025.3	6335.9	3078.4	3371.8	2664.1	3213.2	668.2	996.9	78	-325.7	654.8	518.2	422.9	16.8	378.8	340.1	160.7	235.1
	0 / 0	3748.2	4461.9	3023.9	3461	3423.7	4028.1	3143.1	3827.3	793.6	1004.7	230.5	-151.7	663.9	603.1	691.2	429.2	466.8	426.8	245.2	363.6
	0 / 0	3861.3	4573.5	3781.4	4464.9	3450.4	4055.3	3121.3	3885	897.4	1442.6	503.6	315	748.8	614.7	878.7	751.3	545.8	477.8	269.5	486
	0 / 0	3198.9	3581.5	3937.3	4701.4	4038.2	4755.4	3046.7	3648.1	760.3	1047.1	395	21.8	894.9	815.4	719.3	445.6	625.9	573.4	268.8	335.1
	0 / 0	4210.7	4874.9	4560.5	5526.1	4687.4	5772	3746.4	4782.6	1070.1	1718.5	652.6	438.7	1499.3	1866.3	1157.1	918.6	792.7	950.1	278.9	466.8
	0.08 / 0	9407.4	7715.1	11853.7	11603.3	11502.8	11201.5	8073.3	7578.4	3549.3	4001.2	4273.5	3016.1	4482.6	3830.1	4209.2	3427.8	3134.9	2519.3	2248.9	1574.3
	0.08 / 0	8365.5	6818	10382.2	9971.3	10663.5	10312.9	7542.9	7307.3	2830.7	2732.5	4154.8	2856.5	3960.6	3215.2	3780.2	3050.2	2985.7	2424.2	1989.7	1574.9
	0.08 / 0	11631.3	10826.6	13483.9	13756.7	13500.3	13792.8	9805.7	9783.7	3770.7	4343.5	4797.4	3511	4557	3853.9	4488.4	3850.8	3511.5	3103.7	2219.3	1746.8
	0.08 / 0	10117.3	8670	12017.5	11750.3	11928.2	11896.9	8229.9	8045.7	3224	3705.8	4983.3	3688.3	4656.7	3977	4320.5	3899.9	3262	2690.5	2151.2	1958
	0.08 / 0	11370.2	10340.3	13684.3	13922.3	12936.9	13095	9103.8	9090.6	3603.6	3998.2	4749.9	3380.5	4451.9	3760.9	3990.5	3458	3203.8	2742.6	2080.5	1915.2
	0.08 / 0	16154.5	15342.9	12943.2	13535.5	13018	13874.2	9155.5	9267.8	3866.4	4662.6	5166.9	3854.2	4999.7	4245.8	4767.4	4152.6	3627.7	3025.8	2440.9	2199.4
	0.08 / 0	12725	12147.1	14326.7	14925.9	13593.2	14337.7	9943.7	10270.8	4183.1	5121.7	5580.3	4191	5176.8	4433.6	4679.1	4211.2	3601.2	2911.2	2485.7	2424.7
	0.08 / 0	10805.4	10202.6	13474.4	14197.4	12925.3	13671.9	8993.2	9266.9	3681.9	4292.3	5254	4042.9	5081.1	4402.4	4626.4	4100.7	3615.7	3066.7	2351.9	2100.5
	0.08 / 0	11889.5	11383.9	13202.4	13788.2	12999.8	13894.2	9732.2	10318.3	3880.9	4638	5606.5	4291.5	5314	4611.3	4908.6	4385.8	3706.1	3223.1	2350.1	2129.6
	0.16 / 0	7151.7	4552.2	8320.4	6932.2	7635	5745.9	5932.8	4729.8	2966.3	2376.9	3600.8	2076.2	3344.3	2192.2	2978.5	1789	2746.8	1969.7	2060.7	1492
	0.16 / 0	5826.9	3701	6222.1	4721	5917.6	4358.4	4951.2	3973	2139.9	1720.5	3088.7	1846.1	2600.6	1664.1	1959.8	835.4	2127.3	1432	1572	1092.4
	0.16 / 0	5640.3	4822.7	14411.8	13176	9190.8	7677.9	7478.2	6444.8	3197.7	3297.3	3943.6	2476.9	3434.6	2440.8	3082.6	1923.8	2770.7	2028.6	2126.8	1822
	0.16 / 0	7995	5719	8814.2	7046.6	7746.3	6272.7	6233.8	5173.8	2647.1	2559.4	4178.2	2709	3394.4	2296.9	2791.6	1737.6	2552.6	1790.6	1925	1457.4
	0.16 / 0	9272.7	7298	9656.6	8231.8	8793.7	7540.8	7005.3	5906.8	2907.9	2857.6	4282.8	2717.9	3223.5	1921	2684.1	1683.1	2764	2046.4	1945.3	1508.4
	0.16 / 0	9548.1	8173.9	9277.6	8472.4	9202.6	8437.4	7389.6	6613.8	3293.6	3357.1	4669.5	3240.2	4173.5	3229	3637.4	2489.9	3146.5	2291.6	2315.7	2006.7
	0.16 / 0	10155.7	8434.4	9887.8	8949.3	8555	7522.3	7447.2	6686.7	3364.5	3806.1	4737.3	3133.5	3977.6	2836.9	3340.9	2308.6	3195.8	2387.8	2295.2	1732.5
	0.16 / 0	9241.1	7592.1	9543.5	8521.9	9378.3	8331.8	7162.3	6303.9	3372.6	3399.2	4987.5	3501.1	4171.1	2942	3344.1	2080.7	3249.3	2404.6	2411.9	1938
	0.16 / 0	10394.7	8877.4	9906.9	8901.3	9690.7	8848	7573.3	6734.7	3369.2	3650.7	5175.1	3580.2	4272.5	3100.5	3628	2610.7	3549.9	2838.6	2168	1879.4
	0.24 / 0	9797	5780.9	12326.3	9867.7	11461.6	8429	8401.3	6327.4	4663	4304.5	6365.4	4119.1	5290.7	3548	4633.2	2850.3	4292.1	2743.9	3573.6	2362.9
	0.24 / 0	8899.5	5339.7	10567.5	8205.9	10409.9	7599.1	7863	5989.6	4036.4	3836	6070.1	3932.9	5161.1	3592.1	4291.7	2561.5	4000.1	2793.2	3150.5	2226.8
	0.24 / 0	11664.4	8410.1	13431.2	11188.9	12889.5	10185.1	9679.6	7628.5	4829.2	4589.8	7046.4	4938	5477.3	3752.2	4545.8	2917.6	4495.8	3202.9	3331.2	2387.4
	0.24 / 0	10939.4	7157.3	12518.7	9885	11053.1	8333.9	8355	6358.9	4021	3817.1	7313.4	5087.5	5724.9	4114.9	4610.2	2992.2	4446.7	3129.3	3458.1	2695.3
	0.24 / 0	12565.9	9273.2	13161.6	11196.7	11700.3	9205.9	9466.1	7580.4	4491.2	4409.9	6893.6	4640.7	5405.3	3746.8	4401.9	2950.3	4328.9	2964.4	3174.2	2400.9
	0.24 / 0	13263.2	10870	14332.4	12943.3	13756	12141.4	10542.9	8749.8	5553.1	5808.5	8292	5839.2	6827	4892.4	5814.7	4088.1	5418.5	3930.8	3986.5	3142.1
	0.24 / 0	14618.5	11771	14660	12824.7	13212.7	11219.6	10668.7	8972.2	5590.4	5955.2	8226.4	5819.7	6618.5	4738	5553.4	3919	5329.1	3980.5	3960.3	3133.1
	0.24 / 0	12952.1	10378.6	13887.6	12139.9	13238.9	11169.6	9927	8085.5	5107.3	5186.2	8213.7	6042	6800.7	5039.9	5665	4000.1	5212.6	3724.6	3856.3	3086
	0.24 / 0	13482.4	10991.9	13422.4	11888.4	12725.3	11123.7	9928.2	8239	4920	5045.3	7997.4	5690.4	6519.7	4720.4	5477.6	3789.5	5098.4	3746.6	3538.9	2792.6
	0 / 0.08	10587.1	7427.3	12799.6	11241.8	12242.5	10421.1	9891	8514.7	4836.9	4845.3	5551.1	3705.6	5237.7	3853.2	5226.4	4085.7	4030.9	3028.1	2827.9	2155.2
	0 / 0.08	8933.3	6511.7	10234.5	8669.8	9811.4	7766.7	8229.8	6947.4	3821.2	3739.7	4734.4	3234.7	4351.6	3247.1	3895.7	2717.5	3379.6	2502.2	2154.4	1504.1
	0 / 0.08	13091.3	10703.8	14391.3	13027.5	14023.6	12123.1	11802.7	10475.5	5466.9	5797.3	6376.7	4555.1	5562.9	4329.8	5634.8	4511.3	4238.7	3198.8	2829.2	2078.8
	0 / 0.08	11699	8739.1	12498.1	10549.1	11932.3	9597.6	9907	8594.9	4136.8	4087.7	6166.5	4380.1	5631	4305.8	4613.1	3651.2	4061.7	3175.5	2746.7	2296.4
	0 / 0.08	12290.1	9919.4	14223.8	13013.9	12377.6	10650.7	10984.3	9906.1	4572.4	4909.4	5752.5	3945.4	5013.7	3724.2	4154.3	3069.4	3776.8	2695.3	2351.9	1964
	0 / 0.08	11848.1	10371.1	13111.8	12462.4	13679.7	12722.1	11543	10810.9	4745.3	5160.1	6398.2	4513.5	5848.2	4430.7	5217.3	4016.2	4585.4	3556.5	3007.5	2574.7
	0 / 0.08	14010.2	12112.7	13767.3	13023.6	12360.4	11190.7	11270	10597.9	4854.1	5403.3	6285.5	4436.3	5664.8	4348.4	4914.6	3801.9	4677	3653.5	2736.5	2308.5
	0 / 0.08	12887.4	10930.3	14503.4	13421.4	13451.1	12038.4	11592.3	10674.2	4762.7	5093.6	6773.9	5062.1	6169.6	4950.6	5726.7	4551.7	4606.8	3493.9	3013.6	2709.6
	0 / 0.08	14164.8	12357.3	15411.5	14683.9	14125.2	13085.2	11990.7	11296.2	5130	5898.2	7713.9	5792.6	6748.5	5320.1	5797.8	4824.6	5140.4	4101	3194.1	2862
	0 / 0.16	11594.5	7160.8	13773.1	10692.7	12173.1	7942.1	10652.1	7914.1	5798.7	5588	7327.5	4643.3	6034.3	3990	5754.8	3516.6	5723.1	4106.3	3859.1	2828.4
	0 / 0.16	10402.6	6493.1	12086.2	9121.5	11593.5	7532.2	9723.2	7255.6	5012.4	4583	6672.5	4366.8	5841.5	3886.6	4625.9	2509.7	4892.6	3349.3	3148.3	2085.4
	0 / 0.16	14389	10377.8	16209.6	13112.5	15476.8	11284.6	13710	10781	6174.1	6054.6	8312.4	5867.9	6894.2	4646.7	6353	4224.2	5561.6	3793.3	4053	3213.9
	0 / 0.16	12883.1	8283.2	15264.4	11454.9	13152.4	8406.1	11805	8841.1	5657.5	5486.2	8966.5	6523.8	7283.3	5022.1	6043.6	3824.1	5532.4	3821.5	3753.2	3010.5
	0 / 0.16	15332.6	11099.4	16418.3	13107.1	14608.5	10343.4	13238.2	10601.1	6182.6	6298.6	9117.5	6469.1	7486.9	5192.4	5340.1	3269.5	5553.8	3780.4	3656.2	2828.5
	0 / 0.16	16133.1	12697.8	17698.6	15209.6	17516.9	13766	14337.9	11946.3	7389.9	7739.7	10242.5	7112.3	8777.1	6257.3	7102.5	4522.2	6899.8	4679.8	5144	4076.8
	0 / 0.16	17208	13398.7	17088.1	14528.8	14086.5	10835	13289.4	10980.5	6893.7	7343.8	9117.5	6397.7	8218.6	5557.9	6352.2	4248.1	6095.4	4303.9	4114.8	3276
	0 / 0.16	14989.5	11489.5	17385.7	14569.9	16332.4	12428.6	13751.7	11248.6	6490.8	6620.3	10695.6	7891.1	8670.5	6319.9	7129	4846.5	6937.3	5118.5	4712.4	3847.5
	0 / 0.16	15430.8	12130.6	16464.1	14169.1	14845	11515	13361.6	11082.3	6679.1	7254.9	10498.5	7871.8	8550.4	6149.4	6655.8	4429.3	6828.9	4908.5	4227.8	3412.5
	0 / 0.24	22340.3	13758.7	25258.3	17934.9	23947.5	15737.7	21615.7	14352.6	13710	12545.6	20110.4	14873	19318.7	14171.8	18931.1	13821.2	15984.3	11718.2	11584.9	9136.4
	0 / 0.24	21103.2	13589.2	24288.4	17283.9	24316	16142.3	20883.4	14350.2	13256.9	12776.4	19529.3	14585.3	18618.3	13841.1	17607	12871.3	15218.7	11138.4	10530.2	8015.6
	0 / 0.24	24969.6	17402.7	27325.3	20432.2	28375.8	20163	23673.4	17207.5	15455.5	14895.8	22260.8	16952.5	22016.6	16955.4	20449.2	14940.5	17897.2	13161.7	12683.3	10382.3
	0 / 0.24	26557	17365.8	28217.6	19884.8	25474	16788.8	21048	14294.4	14403.3	13482.5	23709.9	17908.2	23750.5	17989.5	20833.2	15357.4	18521.1	13671.6	13540.3	11010.6
	0 / 0.24	25953.7	18311.4	27657.5	20819.1	25303.3	18010.3	21944.5	16075.8	13331	13127.7	20477.4	15457	19151.5	14435	16637.1	12131.6	15017.3	11059.7	10523.8	8466.6
	0 / 0.24	26900.9	19692.7	29380	23069	31732.6	23916.3	26141.3	19706.1	17206.5	16659.5	24435.5	18460.3	24681.2	18826	23305.7	17179.2	19689	14805.7	14871.1	12479.3
	0 / 0.24	28942.7	21202.1	30465.9	23976.8	28170.8	21624.4	24440.2	18399.4	14917.4	14855.8	22335	16754.4	21666.7	16305.9	19279.4	13965.9	16839.9	12413.2	12263.1	9985.4
	0 / 0.24	27006.3	19459.3	28587.5	21894.1	28341.4	20712.5	24473.1	18196.5	15798.4	15209.4	24511.8	18866.4	24172.3	19037	22673.3	16986.4	19702.7	14825.5	14679.8	12355.4
	0 / 0.24	30923.5	22769.7	32494.9	25371.3	29073.5	21758.4	25771.3	19577.6	16341.6	16048.5	25321.9	19427.9	25737.5	20123.7	22770.6	17279.5	20202.1	15368	15263.1	12984.8
	0.12 / 0.12	20761.5	12018	24083	17102.2	23688.2	15286.2	19970	13313.4	12612.1	11342.4	18696.9	14060.9	17639.5	13264.7	16935.7	12316.3	14016.9	10040.7	11314.6	9231.3
	0.12 / 0.12	20100.2	12791.6	23670.7	16953.1	22900.2	14981.7	19223	13210.3	11304.8	10722.9	17514.5	13209.2	16476.2	12339.4	15203.3	11006.5	13086.9	9679.1	9876.1	7869.8
	0.12 / 0.12	22769.6	15837.7	26544.8	20365.7	26444.7	18704	21566	15622.2	12601.4	12566.7	18817.8	14545.1	17753.8	13529.2	16705.5	12455.2	13969	10334.2	10659.5	8406.7
	0.12 / 0.12	22518.8	14485.7	23945.2	16933.8	22434.1	14638.3	19392.5	13248.9	11513.8	11196.5	18504.4	14180.3	17980.8	13870.2	15297.6	11192.4	13893.6	10359.1	9757.1	7944.3
	0.12 / 0.12	24380.8	16872.5	26725.3	20231.8	24568.5	17366.7	21643.2	15868.6	12639.7	12666.8	18974.1	14497.8	18000.9	13538.3	15100.1	11202.7	14050.7	10456	9936.2	8024.4
	0.12 / 0.12	24312.3	17926.1	26349.8	21024.4	27910.8	21382.5	23423.3	18035.4	13225	13378.2	19212.3	14763.4	18726.8	14571.7	17335.4	12868.7	14671.7	10808.5	11028.8	9092.6
	0.12 / 0.12	27153.3	19695.1	28384.2	22491.4	26030.4	19759.1	23272.6	17736.7	13366.2	13506.2	19772.6	14872.2	18895.8	14336.2	15991.1	11643.2	14147.5	10335	11245.7	9218.3
	0.12 / 0.12	23260.2	16747.2	25519.1	19955.6	25851.6	18997.1	21703.3	16455.7	12515.5	12578.9	19280.1	14973.4	18722.4	14677.6	16588.8	12278.6	14263.7	10758.5	10602.5	9032.4
	0.12 / 0.12	25112.1	18487.2	27186.2	21742.7	26219.4	19968.7	22422.3	17358.4	12744.5	12855.5	19314.3	15051.1	19184.8	14984.4	16454.6	12309.1	14729.2	11384	10514.4	9002.3

## Sheet: Dataset 4
	Dataset S4. Data-set matrix of fluorescence response patterns of milk samples containing a mixture of A. B. (OD600 = 0.1) and/or three individual E. coli strains (OD600 = 0.1)
		pH 7.0										pH 5.0
		P1		P2		P3		P4		P5		P1		P2		P3		P4		P5
		Ch1	Ch2	Ch1	Ch2	Ch1	Ch2	Ch1	Ch2	Ch1	Ch2	Ch1	Ch2	Ch1	Ch2	Ch1	Ch2	Ch1	Ch2	Ch1	Ch2
	A.B. only	8388	9283	8961	10643.8	6736.2	7941.8	7345.8	8996.6	3049.6	4502.4	2566.6	2940.2	3539.6	4329.8	2296.4	2919	3706.4	4876.2	864.6	1472.6
	A.B. only	6013.8	6815.4	6550.8	7652.8	4909.6	5892.4	5701	6900.6	1744.2	2808.4	1427.6	1476.6	1985.8	2349.2	1369.2	1764.4	2152.8	2798.4	437.4	761.2
	A.B. only	6296.6	6920.2	6730.8	7846.2	5199.8	6433.6	6277.2	7507.8	1978	3013.8	1604	1725.8	2085.8	2446.6	1479.8	1927.2	2494	3007.6	489.6	799.2
	A.B. only	5358.2	6090	5619	6642.8	4256.6	5145.2	4720	5747.6	1467.6	2246	1275.4	1477.2	1698.6	1988.2	1093.4	1443	1778	2232.6	446.6	625
	A.B. only	8071.6	9108.8	7351.4	8772.8	5249.2	6297	5465.8	6670.6	1684.8	2706.2	1346.8	1381.2	1863.4	2175.8	1321.2	1531.2	2124.2	2445.4	414	543.6
	A.B. only	5089.6	5495	5526	6411	4044.4	4785	4605.2	5605.6	1454	2166.2	1093.6	1081.4	1446.4	1740.6	1059	1362.8	1894.8	2330.8	371.8	541.6
	A.B. only	5684.4	6257.8	6024.2	7183.2	4789.6	5726.4	5481	6700.4	1634.2	2519.2	1171.6	1136.4	1936.6	2347.8	1253	1588.6	1993.6	2396.8	445.6	680.6
	A.B. only	6700.8	7391.2	6769.6	7822	4809.6	5887.4	6113.2	7458.8	2177.2	3245.4	1672.2	1885.2	2145.2	2704	1518	1907	2724.4	3346.8	582.8	967
	A.B. : E.C. 1	11424	10330.2	12387.8	12547	8606.4	8464	10151.6	10480.8	5215.4	6099	7855.8	6728.4	9000.4	9012.4	6409.2	6188.8	9275	9753.6	4602.6	4704.4
	A.B. : E.C. 1	10544.8	9363.4	12167.4	12258.2	8371.2	8191.8	9794.8	9842.6	5335.2	6322.6	7271.6	6286	8535	8417.2	6047.4	5874.8	8873	9064	4272.2	4117.4
	A.B. : E.C. 1	10805	9827.8	11914.4	12088.4	8637.6	8365	11465.8	11751.6	5145.4	6200.6	7190.6	6185.4	8322.2	8138.6	6211.8	5897.4	9056.6	9148.8	4224	4215.2
	A.B. : E.C. 1	10887.6	9660.8	11928.6	12026.2	7942	7779.6	9716	9677.6	5172.6	6085.2	7134.8	6134.8	8533.2	8295.8	5807	5558.2	8772.8	8788.4	3994.2	4100.8
	A.B. : E.C. 1	11437.2	10320.2	12946.8	12890.6	8967	8912.2	10927.6	10988.8	5284.8	6112.8	7196.2	6143.4	8472	8213.2	6237.2	6022.2	8933.2	9086	3966.4	3823
	A.B. : E.C. 1	10223.8	8807	11172.2	11175.2	7703.2	7445.2	9382.8	9276	4980.4	5806.6	6831.2	5862.8	8594.2	8497.8	5719.4	5479.8	8889.2	9220	3975.2	4017.4
	A.B. : E.C. 1	11040	9834.8	12245.8	12143.2	8567.8	8407.2	10188.2	10519.6	5200	6107.8	6866.6	5886	8286.6	8321	6059.8	5849	8734.2	9220.8	4046.4	4002.4
	A.B. : E.C. 1	10714.4	9512.8	11803.8	11998.6	7993.6	7923.2	9859.2	10123.8	5197	6069	7124.8	6377.2	8313.8	8221	5852.8	5650.6	8899.2	8985	4165.8	4274
	A.B. : E.C. 5	11106.2	9966.6	12431.8	12520	9159.4	8972.8	10268.4	10994.4	5344.6	6299.8	7523.4	6719.2	8049.2	7991.2	6014.6	5823	8090.2	8292.8	3834	3964.4
	A.B. : E.C. 5	10070	8953.6	11816.6	11870.8	8413	8431.4	9681	9973.6	4967.4	5855.4	6002.6	5284.8	6668	6385.4	4927.4	4786.4	6742.6	6824.6	2840.6	3010.8
	A.B. : E.C. 5	10643	9380.8	11686.2	11896.6	9042.2	8671.8	11173	11528.6	5012.6	6074.6	6680.2	5910.8	6986.2	6887.8	5302.4	5112.6	7524.4	7540	3390.4	3472.6
	A.B. : E.C. 5	9484.2	8853.8	10841	11131.6	7860	7640.2	9402.8	9885.8	4607.8	5477.2	5552.4	4871	6066.6	5984.8	4456.2	4299.4	6015.4	6145.4	2633	2585.2
	A.B. : E.C. 5	11116	9556.2	12487	12701.4	8939.8	8875.8	11252.4	11545.4	5232.8	6161.8	6199.6	5298.2	6942.2	6669	5351.2	4921.4	7126.4	7210.6	3089.2	3136.6
	A.B. : E.C. 5	9465.8	8220	10685.2	10707	7815.6	7569.8	9356.4	9418.2	4762.6	5762.2	5803.2	5014	6810.4	6782.8	4852.4	4655.6	6635	6853.2	2959.4	3012.4
	A.B. : E.C. 5	10823.4	9482.8	12082.8	12316.6	8806.4	8586.2	10472.2	10942.2	4928.6	6027	6280.8	5498.6	6933.8	6745.4	5261.8	5046.6	6805.8	7203.2	3130.6	3281.2
	A.B. : E.C. 5	10507.4	9128.8	11658	11962.4	8308.2	8155.8	10226.2	10639	5129.4	6152.4	6372.6	5465	7402.8	7304	5429.8	5071	7437.4	7577.6	3344.4	3321
	A.B. : E.C. 6	9455.6	9890	11053.2	12173.4	7632.2	8395.8	8833.8	9904	3764.8	5181.6	4881.8	4850.8	5135.8	5595.6	3375.2	3541	5022.2	5537	1922.2	2203.2
	A.B. : E.C. 6	8642.8	8981.8	10072.6	11428.2	6823.4	7530.2	8077.4	9166	3288	4472.8	3947.4	3803.6	4085.4	4208.6	2731.4	2807.4	3893.4	4226.6	1566.6	1770.2
	A.B. : E.C. 6	9464.2	9807	9622.6	10712.8	6748.4	7396.2	8085.4	9140.2	2937.8	4010.8	3724.6	3431	3657	3760.2	2536.8	2638.2	3504.4	3872.2	1312.4	1514.6
	A.B. : E.C. 6	8016.6	8301.8	8549.8	9578	6032.6	6629.6	7040.6	7821.8	2656	3623	3316.2	3025.4	3081.8	3251.6	2273.8	2327.2	3069.8	3298	1165.8	1256.2
	A.B. : E.C. 6	8310.8	8482.6	9586.2	10704.2	6342.6	6902.4	7162.2	7885.8	2637.4	3648.8	3298	2953	3400.4	3409.4	2273.4	2242.4	3247.2	3471.2	1258	1163.4
	A.B. : E.C. 6	8294.8	8033.6	8699.6	9182.8	6284.6	6867.4	7186.2	7861.6	2987.8	4097.8	3594.4	3381.2	3739.4	3861	2465.2	2513.4	3566.6	3835.2	1346.6	1434
	A.B. : E.C. 6	8868	9144.2	10412.4	11667.2	6939.8	7624.6	8103.8	9267.8	3284.2	4482.2	3759.4	3408.8	4030	4138.2	2729.4	2809.2	3781	4108.4	1420	1653
	A.B. : E.C. 6	8720.6	8949.2	10116.8	11258.4	6397.2	7062.6	7722	8725.8	3071.6	4253.4	3755.8	3544.2	3768.2	3918.2	2611	2788.8	3881.2	4187.6	1457.6	1594

## Sheet: Dataset 5
	Dataset S5. Data-set matrix of fluorescence response patterns of time-course monitoring of milk spoilage caused by A.B. contamination
		pH 7.0										pH 5.0
		P1		P2		P3		P4		P5		P1		P2		P3		P4		P5
		Ch1	Ch2	Ch1	Ch2	Ch1	Ch2	Ch1	Ch2	Ch1	Ch2	Ch1	Ch2	Ch1	Ch2	Ch1	Ch2	Ch1	Ch2	Ch1	Ch2
	milk / day1	4586	5552.2	4642.4	5477.2	3001.6	3970.8	2715.4	3308.6	1110	1809.4	805.2	943.2	1196	1437	726.8	1022.6	949.6	1236.6	284.6	411.2
	milk / day1	3681.6	4192.2	3478.2	4109.2	2636.4	3348.6	2127	2446.4	843	1392.2	610.6	731	773.8	935.6	597.6	771.4	856	972	246.8	351.2
	milk / day1	3650.6	4190.2	3858	4651.6	3388.6	4166.4	3149.6	3897.6	1122	1809.4	765	869.4	1330	1471.2	790.4	1071.4	1172.4	1459.6	273.2	465.2
	milk / day1	5535.6	6169.8	6093.8	7181.4	4477	5575.4	5287.8	6285.4	1908.8	2819.8	1506.2	1704.2	2110	2608.2	1584.6	2068.4	2340.2	2989.6	540.8	827.6
	milk / day1	5665.2	6497.8	6157.2	7157.6	4600	5634.4	5201	6363.4	2004.2	2940.8	1612	1667.2	2172.4	2732.4	1460.2	1824	2313.6	2850	560.8	951
	milk / day1	5295.2	5966.4	5592.6	6809.4	4250	5321.2	4814.2	5766.8	1777	2723.4	1365.2	1477.6	1982	2501.4	1307.2	1729	2145.4	2756	513.4	857.2
	milk / day2	5047.6	5706.2	4879	6166	3724.4	4684.8	3568.8	4342.8	1348	2153.6	1044.4	1085.8	1685.8	2079.4	1146.4	1532.8	1553	1859.2	403.8	654
	milk / day2	4552	5337.4	4496	5274	2486.2	3154.4	2440.6	2881.6	891.8	1452	779.4	872.4	1063.4	1354.6	716	878.2	848.4	1058	290.6	432.8
	milk / day2	3464	4034.2	3652	4401.6	2772	3392.4	3064.6	3666.8	1024.4	1536.4	767.2	848.2	1168.4	1442.4	898.8	1184.8	1187.4	1438	321.2	586.2
	milk / day2	6142.8	6892	6526.6	7870.2	4862.4	5966.6	5377.2	6674	2061	3018	1704.8	1906.6	2349.6	2876	1709.4	2229.4	2512.8	3207.6	696.2	1010.6
	milk / day2	5981.2	6866.6	6882.4	8255.6	4616.4	5672.4	5397.8	6644.2	2032.2	3084.6	1621.6	1839.8	2426	3021.6	1701.2	2179	2664.2	3326.2	661.6	1069.4
	milk / day2	5918.2	6721	6834.6	8369.8	4755.4	5827.6	5226.2	6466.4	2076.8	2965.6	1721.6	1914.6	2346.4	2889.8	1686.2	2202.4	2593.4	3433.6	677.6	1018.2
	milk / day3	9708.2	11137.6	10485.2	12716.6	6342.2	8043	7978.4	9934.2	2742.2	4254.6	2226	2595.6	3467.8	4241.6	2392.8	3275.6	3748.4	4927.6	840.4	1337.4
	milk / day3	9228.2	10559.2	9990.8	12241.2	5413.8	6639.8	7060.4	8523	2351.4	3545.4	1895.2	2187.8	2756.4	3637.4	1891.4	2504.2	3202.8	4053.2	752	1190
	milk / day3	8422.2	9653.6	9404.4	11681.2	6317.4	7914.6	8162	10029.8	2968.4	4472.8	2273.2	2712.6	3529.2	4545.2	2444.4	3261.6	3913.6	4984.6	912.8	1508
	milk / day3	8917.2	10054.8	10397.8	12195	6940	8358.4	8639.6	10434	3300.4	5024	2876.4	3369	4366.8	5518.8	2843	3848	4925.6	6224.4	1246	1898.6
	milk / day3	8840	10002.6	10394.4	12168	6643.6	8157	8598	10357.6	3216.4	4757.6	2709.4	3253	3955.2	4963.8	2748.2	3713.8	4830.6	6194.6	1216.4	1886.4
	milk / day3	8692.4	9869.8	10266.2	12211.8	6733	8134	8644.2	10728.8	3329.2	4871.2	3013.4	3670.2	4311.4	5307.2	2837	3812.8	4701	6106	1204.6	1889
	milk / day4	7987.6	9236.8	9823.8	11844	6505.6	8050.6	7688	9398.4	2685.6	4152	2013.8	2295.2	2904.4	3799.4	2155.8	2978.8	3267.4	4264.8	741.8	1191
	milk / day4	7483.4	8529.2	8682.8	10566	5514.8	6775.4	6794.6	8342.6	2475	3672.4	1857.8	2084.2	2666	3367.2	1851	2457.8	2954.4	3902.2	694.6	1090.4
	milk / day4	7343.8	8550.6	8482.8	9996.2	6131.2	7608.6	7436	9238.2	2711.6	4232.8	2038.6	2416	2948.2	3754.4	2012.2	2648.6	3341.2	4307.2	820.2	1305.6
	milk / day4	8030.2	9139.6	9628.8	11487.8	6916.2	8383.6	8370.4	10031.4	3141.8	4736.4	2491	2882.6	3798.8	4815.2	2672.2	3461	4223.6	5349.6	1129	1821.2
	milk / day4	8091.8	9181.8	9598.8	11616.2	6401.8	7904.8	8190.2	9961.2	3078.4	4687	2496.8	3073.6	3611.4	4474.6	2493.2	3365.4	3958	5107.6	1035	1700.6
	milk / day4	8543	9709	9981	12033.6	6974	8487.4	8363.6	10219.2	3328.8	5201	2931.2	3475.2	3867	5040.2	2704.4	3548.8	4578	5783.2	1110.8	1939.2
	milk + A.B. / day1	5369.2	6191.8	5492	6737	4041.2	5086.8	3804	4594.6	1497.8	2429	995.2	1158	1451.6	1864.4	1059.4	1498	1527	2020	407.4	605
	milk + A.B. / day1	3436.8	3945.2	3665.4	4231	2651.4	3411.6	2241.6	2605.6	853	1284.8	544.2	582.4	935	1126	588	830	812.2	945.2	247	406.2
	milk + A.B. / day1	5849	6415	6176.8	7430	4423.6	5698.4	4756.4	5761.2	1778.6	2644	1242.8	1313.6	1842.4	2249.4	1264.2	1591.6	1895	2322.8	462.4	784.8
	milk + A.B. / day1	6225.6	7005.6	7281.4	8629	5468.8	6687.6	6023.8	7320.4	2242.4	3334.8	1614.2	1784	2488.4	3202	1686.8	2105.2	2661.6	3374.4	642.2	1010.6
	milk + A.B. / day1	6501.2	7401.6	7591.8	9095.2	5431.4	6598	5948.6	7103.4	2353.4	3562.8	1796	1921	2365.2	3065	1618.6	2176.4	2866.2	3465.4	749.8	1100.6
	milk + A.B. / day1	6396.6	7226.4	7098.2	8508.8	5088.2	6210.4	5276	6431.6	2154.6	3416.8	1732.6	1907.8	2478.6	3101	1618.6	2000.2	2395.6	2940.6	636.2	966.6
	milk + A.B. / day2	11520.2	11730.2	11684.4	12628.2	7696.4	8312.2	9058.2	10270	5227.4	6225	8302.8	7476.4	7920.2	8144	5328	5484.8	6072.6	6676.2	3318.2	3757.2
	milk + A.B. / day2	11157	11300.2	10587.2	11406.8	7130.8	7554.2	8306.4	9343.6	4581.4	5564.6	7634.2	6754.6	7125.6	7063.2	4372	4377.4	5268.2	5576.6	3045	3196.6
	milk + A.B. / day2	10625.8	10749.8	10931.6	11987.2	7656.8	8253.2	8976.6	10163.6	4836.6	5942	7273.8	6706	7218	7605	4690	4794.4	5871.4	6414.2	3210.4	3301.8
	milk + A.B. / day2	12264.6	12204.2	11940	12524.4	7947.4	8293.4	9253.2	10002	4876.8	5515	7753.2	6960	7481	7626.6	5196	5012.6	5903.6	6166.8	3374.4	3520.8
	milk + A.B. / day2	11276.2	11203.2	11416.4	12222.4	7527	8011.4	8714	9855.6	4839.4	5649.4	7149.8	6472.4	6951.8	7085.8	4761.6	4603.8	5757.8	6052.4	3130.6	3381
	milk + A.B. / day2	11619.6	11460.6	11032.2	11822	7609.4	7927.6	8434.8	9430.4	4601.8	5430	7212	6356.4	6688.8	6679.8	4616	4572.4	5247.8	5510	2882	3128
	milk + A.B. / day3	16276.6	13151.6	14535.2	14468.2	9434.2	9681.6	11380.4	12003.4	8423	8247.2	16531.4	13003.6	16488.2	14676.2	11325.2	9946	13432.6	12931.2	10081.6	8981
	milk + A.B. / day3	15832.4	12702	13391	13256.4	8229.2	8558.8	10672.2	11130.4	8293.2	7968.4	15716.4	12295	15347.8	13684.8	9749	8478	11875	11513.4	9347	8239.4
	milk + A.B. / day3	15660.4	12342.6	13326.6	13022.2	8944	9213.4	11060	11208.6	8313.2	8053.4	15296.2	11879.6	15864.6	13813.8	10412.6	9220.6	12249.8	11808.2	10155.2	9230.2
	milk + A.B. / day3	17201.8	13331.2	14755.6	14035.6	9601.4	9702.8	12277.6	12380	8802.6	8247.4	16964.6	13233	16640.6	14436.4	11486.8	9874.6	13488.4	12671.2	10742	9216.4
	milk + A.B. / day3	16481.6	12823	14318.4	13811.2	9541.4	9459.2	11775.2	11821.4	8807	8493	16250.4	12339.2	15639.4	13628	10624.8	9067.8	12618.4	12244.6	9782.2	8724.8
	milk + A.B. / day3	17394.4	13571.2	13965.6	13674.6	9548.6	9476	12131.8	12204	8877.8	8501	16668.6	12838.6	15469.2	13333.6	10952.6	9423.2	12864	12284.2	9854.6	8755
	milk + A.B. / day4	16930	13966.2	11399.6	12282.8	9071.2	9439	9488.6	10417.2	6870.8	6819.8	18270.8	14993	13818	14724	10197.2	10355.4	11499.2	12906	7327.6	8574
	milk + A.B. / day4	16961.8	13813	10612.4	11455.8	8815.2	8751.8	9659.6	10596.6	6625.4	6485	17360.8	13932.6	12188.6	12870.8	8609.6	8684.2	10650.6	11745.2	7004.6	7949
	milk + A.B. / day4	16295.4	13352.8	11660.6	12707.8	8927.2	9147.4	9189.2	10081	6656.6	6593	16947.8	13569.8	12977.2	13659.6	9040.6	9041.6	11144.2	12302.6	7087.2	8168
	milk + A.B. / day4	16468.4	13166	11258.8	11792.8	8927.6	8923	9712.8	10714.8	6558	6265.6	18405	14490.2	13445.2	14098	10414.6	10137.6	12111.6	12959.2	7498	8482.6
	milk + A.B. / day4	16881.4	13595.6	11820.6	12515.2	8864	8915.8	9818	10722	6540	6264	17827	13973.8	13150.4	13938.8	9550.6	9269.2	12011.8	12882.6	7128.2	8083
	milk + A.B. / day4	17200	13945.4	11441.2	11937	8881.6	8839.2	9664.8	10328.8	6624.2	6426	18010.2	14204.4	12859.2	13554	9726.6	9744.2	11785.2	12842.8	7154.6	8189.6

## Sheet: Dataset 6
	Dataset S6. Data-set matrix of fluorescence response patterns of milk samples spiked with three microbial strains (E.C.1, E.C.5, and A. B.; OD600 = 0.1) across five different milk matrices.
			pH 7.0										pH 5.0										Verification by Holdout test
			P1		P2		P3		P4		P5		P1		P2		P3		P4		P5		all variables	Ch1 only	Ch2 only	pH = 7.0 only	pH = 5.0 only
			Ch1	Ch2	Ch1	Ch2	Ch1	Ch2	Ch1	Ch2	Ch1	Ch2	Ch1	Ch2	Ch1	Ch2	Ch1	Ch2	Ch1	Ch2	Ch1	Ch2
	E.C. 1	reference whole milk	9568	8514.8	10665.6	10546.2	8084.4	7790.6	9169	9059.4	4700.2	5471.2	7070.4	6194.4	7903.6	7700.6	5672.8	5515.2	8001.2	7960.8	3841.2	4010.4	-	-	-	-	-
	E.C. 1	reference whole milk	10785.4	9827.6	11459.4	11495.6	8533.6	8376.6	10394.8	10306.8	5028.2	5923.2	7507.4	6504.6	8185	7963.6	5523.2	5367.8	8107.6	8406.4	4069.8	4104	-	-	-	-	-
	E.C. 1	reference whole milk	10063	8905.2	11229	11263.2	7913	7792.4	10285.2	10526.2	4943.6	5890.4	7395.8	6489	8592.4	8504.8	5827.4	5612.6	8167.6	8487	4272.8	4375.4	-	-	-	-	-
	E.C. 1	reference whole milk	10438.4	9338	11433.2	11273	8450.4	8265.2	9976.6	10287.8	4910.4	5971.8	7373.8	6656.4	8504.2	8502.6	5638.6	5534.8	8780.4	8993.4	3930.4	4136.8	-	-	-	-	-
	E.C. 1	reference whole milk	9947.6	8798	11300.4	11116	8299.6	7964.4	9740.8	9722	5206.4	6053.4	7374.2	6490.2	8116.4	8133.6	5776	5647.6	8251.2	8537.4	4003.2	3962.2	-	-	-	-	-
	E.C. 1	reference whole milk	10240.2	9438.2	10772	10695	8160.6	8135.4	9984.6	10035	4948	5688.2	7217	6370.2	7833.6	7908	5668.6	5520.6	8283.6	8635.4	3881.2	4022	-	-	-	-	-
	E.C. 1	same product, different day	9203.2	8567.4	10131.4	10345.2	7435.6	7312	8174.4	8457	4234	5130.6	6016.2	5220	6866.6	6612.8	5137.8	5032.8	6863.2	6900.2	3310.8	3459.2	E.C. 1	E.C. 1	E.C. 1	E.C. 1	E.C. 1
	E.C. 1	same product, different day	10704.6	10043	11352	11614.4	7689.8	7822.6	8691.8	9138.8	4365.2	5420.8	6614.2	5748.6	7024.6	7014.8	5265.6	5089.4	7065.2	7439.6	3594.2	3587.6	E.C. 1	E.C. 1	E.C. 1	E.C. 1	E.C. 1
	E.C. 1	same product, different day	10200.2	9605	11260.8	11748.6	7522.2	7787.4	9492	9789.4	4430.2	5449.4	6022.8	5488	7039.6	6983.4	5097	5103.2	6972.4	7451	3333.8	3481.2	E.C. 5	E.C. 1	E.C. 1	E.C. 5	E.C. 1
	E.C. 1	same product, different day	9908	9272	11194.6	11552.8	7664.8	7856	8966	9166.8	4464.6	5415	5870.8	5300.4	7091.6	7141.2	5184.8	5116.4	7291.8	7682	3131.8	3413.2	E.C. 5	E.C. 1	E.C. 1	E.C. 1	E.C. 1
	E.C. 1	same product, different day	9756.4	9185	10790.8	11065.6	7348.2	7594.2	8710	8870.4	4555.6	5668.6	6088.8	5364	6896.4	6964.2	4994.2	4983.8	7329.8	7620.6	3439.6	3641.8	E.C. 5	E.C. 1	E.C. 1	E.C. 1	E.C. 1
	E.C. 1	same product, different day	9733.2	9099.2	10825	11416	7435.2	7494.2	8860.6	9011.6	4271.2	5373.8	5838.2	5301.4	6621.4	6614.8	4875.8	4847.6	6829.8	7004.4	3154.4	3231.6	E.C. 5	E.C. 1	E.C. 1	E.C. 5	E.C. 1
	E.C. 1	same product, different lot	9457	8532.2	11064.8	11112	8050	7795.8	8986.8	9188	4651.8	5556.6	6247	5576.8	7154	7124.8	5117.2	4897.2	7149.2	7230	3412.4	3414	E.C. 1	E.C. 1	E.C. 1	E.C. 1	E.C. 1
	E.C. 1	same product, different lot	10658.4	9808.8	11994.2	12136.4	8461.8	8478.4	10101.6	10357.6	4796	5734.6	6442.4	5451	7173	7026.8	5147.2	4876.4	6890.2	7098.4	3257.6	3294.2	E.C. 1	E.C. 1	E.C. 1	E.C. 1	E.C. 1
	E.C. 1	same product, different lot	10340.8	9574.4	11691.6	11856.4	8228.4	8142	10075	10245.8	4911.2	5989.8	6325.4	5626.4	7339	7166.2	5130	4835.6	7068.6	7238.4	3468.6	3363	E.C. 1	E.C. 1	E.C. 1	E.C. 1	E.C. 1
	E.C. 1	same product, different lot	9898.4	8910	11486	11525	8325.8	8187.2	9821.6	10134.4	4697.6	5586	6334.8	5681.8	7292.4	7352	5205.8	5037	7515.6	7859.4	3361.2	3348.8	E.C. 1	E.C. 1	E.C. 1	E.C. 1	E.C. 1
	E.C. 1	same product, different lot	10496.6	9635.2	11772.2	12207.8	8414.6	8555	9406.2	9572	4997.6	6207.4	6270.4	5613	7398.6	7231	5092	5059.4	7437	7687.6	3487	3502	E.C. 5	E.C. 1	E.C. 1	E.C. 5	E.C. 1
	E.C. 1	same product, different lot	10038	9226.6	10871	11096.8	8105	8031.8	9700.2	9943	4826.6	5839.4	6192.8	5434	7024	7055.4	5123.6	4909	7132.2	7401.2	3340	3349	E.C. 1	E.C. 1	E.C. 1	E.C. 1	E.C. 1
	E.C. 1	different manufacture	9569.2	8842.6	10938.8	11323.4	7883	7976	9238.4	9585.2	4628.6	5698.2	6081.8	5286.6	7392	7400.4	5277	5184	7271.4	7669.4	3571.8	3551	E.C. 5	E.C. 1	E.C. 1	E.C. 5	E.C. 1
	E.C. 1	different manufacture	10960.6	10394.6	12254.2	12859.8	8183.2	8247.4	10256.2	10764.6	4931.6	5987.4	6545.4	6071.4	7894.2	7980.4	5435	5206	7731.4	8123	3352.8	3638.2	E.C. 5	E.C. 1	E.C. 1	E.C. 5	E.C. 1
	E.C. 1	different manufacture	10826.4	10237.4	11433	12011.2	8321.2	8679.2	10498.2	11323.8	4892.8	5912.8	6311.6	5599.8	7292.2	7492.6	5078	5056.8	7484.2	7790.6	3433.8	3718.6	E.C. 5	E.C. 1	E.C. 1	E.C. 5	E.C. 1
	E.C. 1	different manufacture	10353.2	9767.8	11749.6	12539.8	8361.4	8607.4	9575.4	10101.6	5035	6138.2	6714.2	6054.8	7726	7850.8	5566.8	5545	7961.4	8662	3561.2	3775.8	E.C. 5	E.C. 1	E.C. 1	E.C. 5	E.C. 1
	E.C. 1	different manufacture	10687	10334.2	12279	13004.6	8353.4	8491	9622.2	10317	5138.6	6233.4	6166.2	5505	7479	7641.6	5145	5273.6	7414.2	8034.6	3341.2	3564.2	E.C. 5	E.C. 1	E.C. 1	E.C. 5	E.C. 5
	E.C. 1	different manufacture	10273.4	9945	11307.4	11991.2	7865.8	8063.2	9916.2	10320.2	4978	6153.4	6323.4	5821	7354	7630.8	5200.4	5292.6	7778.2	8079.4	3345.4	3535.6	E.C. 5	E.C. 1	E.C. 1	E.C. 5	E.C. 1
	E.C. 1	low-fat milk	10303.4	9105.4	11834.6	11833.8	8601	8594.8	9611.4	9681.6	4966	5969.6	7044.2	6299.6	7849.2	8018	5689	5428.6	8085.8	8236.4	3709.4	3884	E.C. 1	E.C. 1	E.C. 1	E.C. 1	E.C. 1
	E.C. 1	low-fat milk	11302.4	10428.6	12868.6	12930.4	8995.8	8954	10920.6	11156.6	5329.4	6187	7203.2	6332.6	8171.4	8291.2	5500.6	5290.6	7976.2	8346.2	3939	4011.8	E.C. 1	E.C. 1	E.C. 1	E.C. 1	E.C. 1
	E.C. 1	low-fat milk	11289	10424	12062.8	12465	8530.8	8649.6	10748.8	11052.4	4965.6	6002.6	7084	6481.6	8174	8396.2	5687.8	5510.8	8403.8	8782	3883	4019.6	E.C. 1	E.C. 1	E.C. 1	E.C. 1	E.C. 1
	E.C. 1	low-fat milk	10348.6	9353.2	12079	12086.4	8917.2	8753.4	9698.2	9873.6	5114.4	6053	7193.2	6375.8	8362.6	8398	5416.4	5372.6	8756.4	9337.2	3972.4	3979.4	E.C. 1	E.C. 1	E.C. 1	E.C. 1	E.C. 1
	E.C. 1	low-fat milk	10863.8	9924	12388.8	12715.4	9002.4	8909.4	9840.6	10136.4	5306.2	6331.6	7110	6364.4	8567.4	8562.6	5580.6	5584.8	8265.6	8862.8	3886	4143.2	E.C. 1	E.C. 1	E.C. 1	E.C. 1	E.C. 1
	E.C. 1	low-fat milk	10532.8	9576.2	12246.6	12451.6	8653.6	8623	9928.2	10050.2	5194.6	6222	7421.2	6738	8215.6	8383	5676.4	5604.2	8414.6	8996	3956	4088	E.C. 1	E.C. 1	E.C. 1	E.C. 1	E.C. 1
	E.C. 5	reference whole milk	7586	7303.6	8614.2	9164.4	6364.6	6653.2	8106.2	8701.6	3077.4	3997.6	3842.2	3390.8	3984	4072	2948.2	3077.8	4155.6	4382.2	1642	1655	-	-	-	-	-
	E.C. 5	reference whole milk	7496.2	7387.4	8879.4	9438.8	6346.8	6720.8	8159	8748.2	3270.2	4220	4139.8	3658.4	4389	4425.8	3115.4	3217.6	4783.4	4935.4	1765.4	1872	-	-	-	-	-
	E.C. 5	reference whole milk	7666.2	7519.2	8808.2	9325	6688.2	7087.8	8487.8	9180.6	3467.8	4370.8	4134.4	3711.6	4387	4467.6	3129.6	3229.4	4665.2	5144	1775	1846.6	-	-	-	-	-
	E.C. 5	reference whole milk	7861.8	7612.2	9052	9578.2	7034.6	7181.8	7934.2	8512.4	3441.8	4482.8	4249.6	3753	4387.6	4625.6	2924.6	2974	4222.8	4598.2	1837	1849	-	-	-	-	-
	E.C. 5	reference whole milk	8647.6	8295.6	9568.4	10310.4	7364.2	7520.6	9279.6	9939.2	4048.8	5027.4	4855.8	4407.6	5164	5304.6	3583.8	3718.6	4889.6	5231.8	2022	2200.6	-	-	-	-	-
	E.C. 5	reference whole milk	8314.8	7875.8	9714.8	10294.2	6723.2	7142.8	8854.2	9756.4	3622	4785.2	4433.2	4067.4	4750.4	5009.2	3385.2	3477.6	4932.8	5421.4	1990.2	2225.6	-	-	-	-	-
	E.C. 5	same product, different day	7299.6	7264.6	8460.4	9004.2	5962	6324.2	7571	8250.2	2945.6	3787.8	3601	3177.4	3814.2	4047.8	3189.4	3177.2	4200	4477.8	1633.4	1759.6	E.C. 5	E.C. 5	E.C. 5	E.C. 5	E.C. 5
	E.C. 5	same product, different day	7120.4	7022.4	8289	8734.6	5851.2	6059.6	7436.8	7944.6	2969.4	3710	3528.6	3218.4	3888.8	3783.4	2983.2	3040.8	4483.8	4766.2	1647.6	1714.8	E.C. 5	E.C. 5	E.C. 5	E.C. 5	E.C. 5
	E.C. 5	same product, different day	7603.4	7292.6	8372.4	8974.4	6002.4	6243.4	7674.8	8318	3120	4042.2	3853.6	3588.2	4227.2	4384.2	3099.8	3145	4370.2	4678	1750.8	1876.8	E.C. 5	E.C. 5	E.C. 5	E.C. 5	E.C. 5
	E.C. 5	same product, different day	7432	7242.8	8513.6	9044.4	6093.2	6398.4	7106.8	7659.8	2996.6	3773.2	3633.6	3261.6	3818.6	3972.4	3144.4	3220.6	3976.4	4269.6	1612.6	1664.4	E.C. 5	E.C. 5	E.C. 5	E.C. 5	E.C. 5
	E.C. 5	same product, different day	7929.8	7940	8989.2	9820	6368.8	6833.4	7940.6	8719	3277	4314.6	3758.6	3346	4396.2	4578.2	3292.8	3373.8	4467.6	4903.4	1827	1984.6	E.C. 5	E.C. 5	A.B.	E.C. 5	E.C. 5
	E.C. 5	same product, different day	7456.6	7402.8	8466.2	9123.6	5896.4	6292.2	7562.2	8083.4	3059.6	3979.6	3580.8	3260.2	4105.6	4193	3071.8	3139	4203.6	4747	1631.2	1777.4	E.C. 5	E.C. 5	E.C. 5	E.C. 5	E.C. 5
	E.C. 5	same product, different lot	6514.8	6391.8	7388	7802.2	5610	5804	7006.2	7669	2789.2	3408	3138.6	2710	3443	3432.6	2585.2	2596.6	3358.6	3560	1402.4	1488	E.C. 5	E.C. 5	E.C. 5	E.C. 5	E.C. 5
	E.C. 5	same product, different lot	6379.2	6130	7300.6	7836.4	5426.8	5929.8	6711.6	7174.4	2750.4	3349.6	3263.8	2729	3253.8	3421	2546.2	2523.2	3731.4	3841.4	1395.6	1400	E.C. 5	E.C. 5	E.C. 5	E.C. 5	E.C. 5
	E.C. 5	same product, different lot	6519.8	6300	7133.6	7493.6	5652.8	5998.4	6710.2	7439.6	2639.4	3447.2	3067.2	2677.6	3346.6	3323	2560.8	2469.6	3253.2	3483	1358.8	1417	E.C. 5	E.C. 5	E.C. 5	E.C. 5	E.C. 5
	E.C. 5	same product, different lot	6447	6313.4	6632.6	7014	5221	5650.8	6100.6	6620.8	2390.4	3101	2839.2	2378	2915.2	2918.4	2337.2	2243.2	2882.6	3054.8	1264.8	1197	E.C. 5	E.C. 5	E.C. 5	E.C. 5	E.C. 5
	E.C. 5	same product, different lot	7106.6	7031.8	7860.2	8358.8	5929.4	6361.2	7200.4	7890.6	2896.8	3627.4	3252.2	2902.6	3691.6	3713.2	2717	2718.4	3729	3998.2	1510.4	1466.8	E.C. 5	E.C. 5	E.C. 5	E.C. 5	E.C. 5
	E.C. 5	same product, different lot	6686.2	6559	7689.4	8363	5961.4	6308.4	7410.2	8010.2	2877	3693.4	3201.6	2975.8	3619.4	3674.6	2520.6	2687	3582	3809.2	1464.2	1588.2	E.C. 5	E.C. 5	E.C. 5	E.C. 5	E.C. 5
	E.C. 5	different manufacture	9479.8	8925.6	10462.6	11010.6	7727.8	8074.4	9461.4	10310.6	4290.4	5354	4697.8	4287.2	5432.4	5512.6	4005.4	4151	5801.2	6038	2351.6	2593.8	E.C. 5	E.C. 5	E.C. 5	E.C. 5	E.C. 5
	E.C. 5	different manufacture	8979.8	8661.2	10638.6	11246	7505.6	7608.8	9439.2	10250.8	4213.8	5261	4992	4636	5768.8	5853.4	4160.8	4236.6	6065.6	6275.8	2335.4	2509	E.C. 5	E.C. 5	E.C. 5	E.C. 5	E.C. 5
	E.C. 5	different manufacture	8975.4	8827	10369.4	11116	7820.2	8274.2	9460.2	10180.6	4340.4	5470.2	4492	4001.2	5098.8	5247.8	3790.2	3853.6	5479.8	5911	2110.4	2346.6	E.C. 5	E.C. 5	A.B.	E.C. 5	E.C. 5
	E.C. 5	different manufacture	9027.6	9005.4	10491.4	11131.2	7441	7726.2	8687	9484.2	4092.4	5133.4	4510.6	4111.6	4950	5193.2	3672.8	3805.6	5025.8	5539.2	2122	2198.4	E.C. 5	E.C. 5	A.B.	E.C. 5	E.C. 5
	E.C. 5	different manufacture	10030.2	9487.6	11802.4	12647.8	8489.6	8918	10277.6	11310.2	4857.6	6025.8	5612.8	5091	6391.8	6544.6	4561	4619.6	6605.8	7167	2742.6	2933.8	E.C. 5	E.C. 5	E.C. 5	E.C. 5	E.C. 5
	E.C. 5	different manufacture	9237.4	8892	11206.6	12201.8	7693.4	7979.4	9196.4	10170	4312.2	5508.4	4627.8	4313.6	5685.4	5904.8	3952.6	4141.8	5625.6	6367.4	2330.4	2561	E.C. 5	E.C. 5	A.B.	E.C. 5	E.C. 5
	E.C. 5	low-fat milk	9233.4	8439.6	11047.8	11618.4	8269.6	8077.8	10039.6	10543.4	4085.2	4949	5490.2	4838.8	6063	6077.8	4285	4273.6	6201.8	6378.8	2576	2703.6	E.C. 5	E.C. 5	E.C. 5	E.C. 5	E.C. 5
	E.C. 5	low-fat milk	9084	8432.6	11073.8	11452.2	8333.6	8253.8	9477.4	9931	4372.2	5489.8	5567.6	4982.6	6064.2	5969.8	4177.4	4304.2	6740.2	6990.6	2719.4	2840.4	E.C. 5	E.C. 5	E.C. 5	E.C. 5	E.C. 5
	E.C. 5	low-fat milk	9283.4	8613.6	11171.8	11578.8	8428	8524	9780.6	10184	4548.4	5565.4	5808	5217.2	6071	6066.6	4553.2	4416	6383.2	6776	2649.6	2726.2	E.C. 5	E.C. 5	E.C. 5	E.C. 5	E.C. 1
	E.C. 5	low-fat milk	9028	8492.6	10492.8	11048.6	8039.6	8124	8820.6	9143.2	4391.8	5225.6	5322.8	4750	5422.8	5468.2	3957.2	3890.6	5598.6	5851.4	2302.8	2323.6	E.C. 5	E.C. 5	E.C. 5	E.C. 5	E.C. 5
	E.C. 5	low-fat milk	9639.2	8879.2	11342.2	11849.2	8493.6	8828	10006.2	10434.2	4664.8	5698.4	5681.8	5233.4	6260.8	6418.2	4420	4336.4	6589.2	7124	2603.2	2720.8	E.C. 5	E.C. 5	E.C. 5	E.C. 5	E.C. 5
	E.C. 5	low-fat milk	9308	8720.6	11505	12181	8413.8	8470.6	9905.4	10486	4575	5592.6	5767.6	5361	6150.2	6295.8	4306.2	4310.4	6271.2	6927.4	2669	2805.4	E.C. 5	E.C. 5	E.C. 5	E.C. 5	E.C. 5
	A.B.	reference whole milk	8254	9225.4	8746	10586.2	6145.8	7554.4	6460	7933.2	2812.4	4352.6	2706.8	3138	3435.8	4321.4	2167.2	2863.4	3524	4387.2	1094	1726	-	-	-	-	-
	A.B.	reference whole milk	8948.2	10115.2	9255	10978.4	6273	7693	6646.6	8444.6	2967	4531.6	2794	3113.4	3655.4	4565.8	2222.2	2820.8	3140.8	3924.4	997.6	1542.6	-	-	-	-	-
	A.B.	reference whole milk	8588.8	9687.8	9018.4	10868.6	6232.6	7584.4	7304.6	9036.8	2985.4	4556.8	2600.6	2938.2	3399	4279.4	2158.8	2829	3445	4370.2	990	1528.8	-	-	-	-	-
	A.B.	reference whole milk	8082.2	9183.6	8719	10469.6	6277	7825.2	7262	8794	2973.4	4441.2	2615.2	3027.2	3384.6	4203.8	2089.8	2805.2	3600.2	4507.6	937.6	1459.8	-	-	-	-	-
	A.B.	reference whole milk	7955.4	9344.6	8343	10131.8	5407.2	6873.4	5674.6	7317	2672.2	4002.6	2467.8	2924.8	3210.8	3890.4	1966.4	2593.6	2767.2	3658.4	864.8	1364.4	-	-	-	-	-
	A.B.	reference whole milk	7813	8983.6	8084.6	9893.2	5594.6	6928.4	5771.8	7148.2	2581	4002	2476.2	2883	2977.2	3637.8	1946.2	2451.2	2699.6	3514	812.8	1341.4	-	-	-	-	-
	A.B.	same product, different day	5044.2	5773.6	5487.2	6573.4	4399.2	5464	4635.6	5812.6	1797.4	2668.8	1460	1485.4	1870.6	2365.4	1352.2	1745.8	2001.4	2455.4	536	850.8	A.B.	A.B.	A.B.	A.B.	A.B.
	A.B.	same product, different day	6139.6	6844.4	5672.8	6939.4	4367.8	5486.6	5219	6445.4	1604	2496.8	1613.6	1826	2076.6	2490.4	1386	1790	1917.2	2493.6	533.2	813.8	A.B.	A.B.	E.C. 5	A.B.	A.B.
	A.B.	same product, different day	5572	6304.8	5343.6	6499.8	4456.2	5640.6	4947.4	6143.8	1701.6	2633	1416.4	1622.4	2036.4	2598.2	1270.4	1609.6	1898	2380.4	492.6	748.6	A.B.	A.B.	E.C. 5	A.B.	A.B.
	A.B.	same product, different day	5943.8	6854.2	6076	7387.6	4814	6226.8	5879.4	7237.6	1930	2989.2	1528.8	1691.2	2194.6	2800.6	1601.8	1962.4	2222.6	2751.4	564.2	923.2	A.B.	A.B.	A.B.	A.B.	A.B.
	A.B.	same product, different day	5704.2	6663.4	5911.2	7416	4435.8	5655.4	4808.8	6247	1962	2990.4	1593.4	1782	2265.2	2810	1458.6	1923.6	2287.4	2908.4	549	832.8	A.B.	A.B.	A.B.	A.B.	A.B.
	A.B.	same product, different day	5270	6177.4	5789.6	6949.4	4577	5547.8	4481.8	5581.8	1863.6	2692.8	1440.8	1663.8	2009	2480.2	1301.2	1715.2	1870.6	2133.4	470.2	785.8	A.B.	A.B.	A.B.	A.B.	A.B.
	A.B.	same product, different lot	6133.4	6822.8	6201	7522.2	5276.6	6313.6	5428	6705	1943.2	2934	1617.4	1648.6	2134.4	2618	1485	1830	2444.6	2902.2	555.4	922.2	A.B.	A.B.	A.B.	A.B.	A.B.
	A.B.	same product, different lot	6375.4	7191.6	6787	8018.4	5184.2	6352.8	6069.6	7373.2	1906	3030.6	1621	1633	2200.2	2591.4	1421	1793.6	2134.2	2675.4	590.6	940.6	A.B.	A.B.	A.B.	A.B.	A.B.
	A.B.	same product, different lot	6029	6846.8	6190	7503.2	4617	5665	5542.6	6695.8	2022.2	2983.2	1491.8	1666.4	2067	2675.8	1306.2	1724.4	2268	2855.4	525.2	837.8	A.B.	A.B.	A.B.	A.B.	A.B.
	A.B.	same product, different lot	6051	6816.8	6444.8	7657.6	4883.4	6162.2	5845.8	7139.2	2139.4	3214.4	1673.4	1833	2139.2	2714.4	1552.8	1931.2	2246.8	2745.6	592.6	921.6	A.B.	A.B.	A.B.	A.B.	A.B.
	A.B.	same product, different lot	6082.6	6896.6	6176.4	7538	5029.6	6057.2	5862	7226.2	2064.4	3139.8	1592.6	1711.8	2072	2571.2	1503.2	1916.8	2209.8	2828	633.2	899.2	A.B.	A.B.	A.B.	A.B.	A.B.
	A.B.	same product, different lot	6029.6	6637.8	6614	8014.8	5226.4	6386.4	5813	7123	2184.8	3372.6	1594.4	1682.2	2252.6	2663.2	1506	1930	2534	3075.4	530	814.6	A.B.	A.B.	A.B.	A.B.	A.B.
	A.B.	different manufacture	6980.8	8059.4	7556.2	8953.2	5668.8	7084.6	6716.6	8311.6	2489.6	3751	2137	2385.2	2862.4	3492.6	1803.8	2276.2	3013.8	3960.6	705.6	1086.6	A.B.	A.B.	A.B.	A.B.	A.B.
	A.B.	different manufacture	7315	8146.6	7589.8	9174.8	5439.4	6823.8	6589.8	7969.4	2473.8	3877.8	2352	2556	3011.8	3744.2	1942	2566	3500	4402	803.8	1334	A.B.	A.B.	A.B.	A.B.	A.B.
	A.B.	different manufacture	7337.6	8263.2	7734.2	9209.2	5712.2	7038	6621.6	8286	2603	3894.2	2168.8	2469.6	2692	3385.4	1906.8	2415.4	2962.2	3785.6	712.4	1116.8	A.B.	A.B.	A.B.	A.B.	A.B.
	A.B.	different manufacture	6911	7886.2	6925	8494.6	5416.2	6672.8	6102	7426.8	2407.4	3509	2029.4	2290.8	2683.2	3308.6	1758.2	2357.8	2797.8	3489	756.4	1168.2	A.B.	A.B.	A.B.	A.B.	A.B.
	A.B.	different manufacture	6946.8	7814.4	7632.4	9411.6	5589.2	7110	6396.6	8145.2	2441.4	3716.8	2105.6	2408.2	2889	3696.4	1941.2	2580	3114.2	3991.2	796.4	1230.4	A.B.	A.B.	A.B.	A.B.	A.B.
	A.B.	different manufacture	7731.2	8867.4	8278.6	10205.6	5709.4	7238.4	7222.6	9065.6	2655	4051.6	2417.8	2708.6	2970.8	3857.6	1994.4	2716	3110.8	4151.6	784	1179.2	A.B.	A.B.	A.B.	A.B.	A.B.
	A.B.	low-fat milk	4818.2	5552.4	5403.8	6471	4296.2	5382.4	5281	6389.4	1669.2	2532	1185.6	1146.2	1773.8	2142.8	1302.8	1627.8	1956.2	2342.2	423.2	614.8	A.B.	A.B.	E.C. 5	A.B.	A.B.
	A.B.	low-fat milk	4971.2	5509.8	5247.8	6141.4	4471.8	5390	4902.2	5861	1694	2663	1250.4	1427.8	1814.2	2191.6	1223.4	1524.8	2080.8	2654.4	416.6	665.8	A.B.	A.B.	E.C. 5	E.C. 5	A.B.
	A.B.	low-fat milk	5001.8	5656.4	5366	6292.8	4376.2	5357.6	5351.2	6375	1677.6	2426.4	1329.6	1354.4	1814.2	2243	1353.2	1787.2	2004.4	2561.4	403.6	658	A.B.	A.B.	E.C. 5	E.C. 5	A.B.
	A.B.	low-fat milk	4492.2	5066.4	4690.6	5389	3853.4	4804.8	4263.4	5163.8	1626.2	2414.8	1087.8	1195.6	1565.2	1861	1079.4	1444.2	1674.6	2007.4	332	561.6	A.B.	A.B.	E.C. 5	E.C. 5	A.B.
	A.B.	low-fat milk	4892	5747.4	5278.8	6477.2	4384.8	5501	5093.6	6102.4	1776.6	2707.8	1288.2	1436.8	1937.8	2331.8	1410.2	1812	2185.8	2689	489.4	782.2	A.B.	A.B.	E.C. 5	A.B.	A.B.
	A.B.	low-fat milk	5300.6	5856.6	5601	6655.6	4708.6	5811.2	5359.4	6758	1828.4	2748.2	1326.2	1391.2	1939.2	2318	1363.6	1701.8	2211.8	2804.4	490.2	832.4	A.B.	A.B.	E.C. 5	A.B.	A.B.
